# Supplementary material for: Synthesis of Cu1Mg3Sc2(OH)12CO3 layered double hydroxide and its derived catalyst for hydrogenation of DMCD to CHDM
Source: Royal Society of Chemistry journal article supplement (doi:10.1039/d3ta06081k), 2023-11-29
Supplement: d3ta06081k1.pdf [file d3ta06081k1.pdf]

## Supporting information

### Synthesis of $\text{Cu}_1\text{Mg}_3\text{Sc}_2(\text{OH})_{12}\text{CO}_3$ layered double hydroxide and its derived catalyst for hydrogenation of DMCD to CHDM

#### Authors:

Zhili Chang<sup>a</sup>, Boyong Ye<sup>a</sup>, Zixin Zhong<sup>a</sup>, Songlin Wang<sup>b</sup>, Han Wang<sup>b</sup>, Weichen Du<sup>b</sup>, Zhaoyin Hou<sup>a,b,\*</sup>

<sup>a</sup> Key Laboratory of Biomass Chemical Engineering of Ministry of Education, Department of Chemistry, Zhejiang University, Hangzhou 310058, China.

<sup>b</sup> Zhejiang Hengyi Petrochemical Research Institute Co., Ltd., Hangzhou 311200, China

\* Corresponding author

Zhaoyin Hou

Tel/Fax: 86-571-88273283

Email: [zyhou@zju.edu.cn](mailto:zyhou@zju.edu.cn)

**Synthesis of  $\text{Cu}_1/\text{Mg}_3\text{Al}_2\text{O}_6$ :** 6.03 g  $\text{Cu}(\text{NO}_3)_2 \cdot 3\text{H}_2\text{O}$ , 19.23 g  $\text{Mg}(\text{NO}_3)_2 \cdot 6\text{H}_2\text{O}$  and 18.73 g  $\text{Al}(\text{NO}_3)_3 \cdot 9\text{H}_2\text{O}$  were dissolved in 400 mL water, which was designated as solution A; 12.80 g NaOH and 10.60 g  $\text{Na}_2\text{CO}_3$  were dissolved in 400 mL water and labelled as solution B. Solution A and solution B were added dropwise into a beaker under stirring, and the pH of the combined solution was maintained at 9.5 with an online pH meter. Subsequently, the above mixture was vigorously stirred at room temperature for 3 h. And then, the formed solid was filtered, washed with water until the pH of filtrate was close to 7, and the resulting solid was dried at 80 °C for 12 hours and denoted as  $\text{Cu}_1\text{Mg}_3\text{Al}_2(\text{OH})_{12}\text{CO}_3$ . After calcination (at 400°C for 4 h), above LDH structured precursor was designated as  $\text{Cu}_1\text{Mg}_3\text{Al}_2\text{O}_7$ . Before catalytic reaction,  $\text{Cu}_1\text{Mg}_3\text{Al}_2\text{O}_7$  was further reduced in  $\text{H}_2$  (at 300 °C for 1 h) and the final catalyst was labelled as  $\text{Cu}_1/\text{Mg}_3\text{Al}_2\text{O}_6$ .

**Synthesis of  $\text{Cu}_1/\text{Mg}_3\text{Sc}_2\text{O}_6$ -IM:** Firstly, supporter  $\text{Mg}_3\text{Sc}_2\text{O}_6$  was prepared by the same steps as preparation of  $\text{Cu}_1\text{Mg}_3\text{Sc}_2\text{O}_7$ . Subsequently, 3.04 g  $\text{Cu}(\text{NO}_3)_2 \cdot 3\text{H}_2\text{O}$  was dissolved in 4 ml water and stirred well, and then 4.00 g  $\text{Mg}_3\text{Sc}_2\text{O}_6$  was added to above solution. After ultrasonic treatment for 30 min, the mixture was dried in an oven at 80 °C for 12 h. After calcination (at 400°C for 4 h), above sample was designated as  $\text{CuO}/\text{Mg}_3\text{Sc}_2\text{O}_6$ -IM. Before catalytic reaction,  $\text{CuO}/\text{Mg}_3\text{Sc}_2\text{O}_6$ -IM was further reduced in  $\text{H}_2$  (at 300 °C for 1 h) and the final catalyst was labelled as  $\text{Cu}_1/\text{Mg}_3\text{Sc}_2\text{O}_6$ -IM.

**Table S1**

The lattice parameters of LDH precursors.

| Sample                                                         | $d_{003}$ (nm) | $d_{110}$ (nm) | $a$ (nm) <sup>a</sup> | $c$ (nm) <sup>b</sup> |
|----------------------------------------------------------------|----------------|----------------|-----------------------|-----------------------|
| $\text{Cu}_1\text{Mg}_3\text{Al}_2(\text{OH})_{12}\text{CO}_3$ | 0.7584         | 0.1528         | 0.3056                | 2.2752                |
| $\text{Cu}_1\text{Mg}_3\text{Sc}_2(\text{OH})_{12}\text{CO}_3$ | 0.7691         | 0.1585         | 0.3170                | 2.3073                |
| $\text{Mg}_6\text{Al}_2(\text{OH})_{16}\text{CO}_3$            | -              | -              | 0.3060                | 2.3400                |

<sup>a</sup> parameter  $a = 2d_{110}$ .<sup>b</sup> parameter  $c = 3d_{003}$ .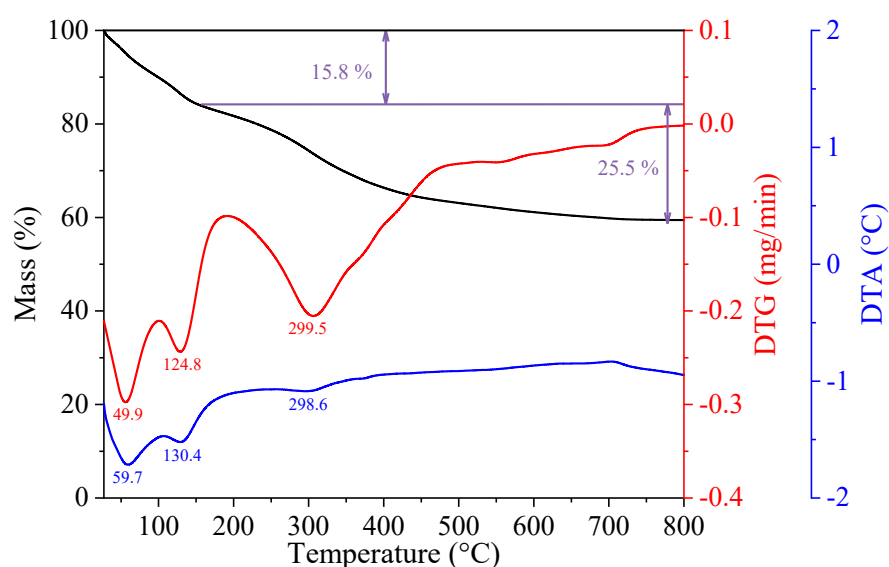**Fig. S1.** TG-DSC curve of  $\text{Cu}_1\text{Mg}_3\text{Sc}_2(\text{OH})_{12}\text{CO}_3$ .Theoretical mass loss from  $\text{Cu}_1\text{Mg}_3\text{Sc}_2(\text{OH})_{12}\text{CO}_3$  to  $\text{Cu}_1\text{Mg}_3\text{Sc}_2\text{O}_7$ :

$$m_{\text{theoretical}} = (M_{\text{LDH}} - M_{\text{LDO}} / M_{\text{LDH}} \times 100\% = (490.53 - 338.40) / 490.53 \times 100\% = 31.0\%$$

Actual mass loss of hydroxyl and carbonate in DG-DSC curves of

 $\text{Cu}_1\text{Mg}_3\text{Sc}_2(\text{OH})_{12}\text{CO}_3$ :

$$m_{\text{actual}} = (m_{3\text{rd}} / (100\% - m_{1\text{st}} - m_{2\text{nd}})) \times 100\% = 25.5\% / (100\% - 15.8\%) \times 100\% = 30.3\%$$

The above calculations showed that  $m_{\text{theoretical}}$  is in good agreement with  $m_{\text{actual}}$ .

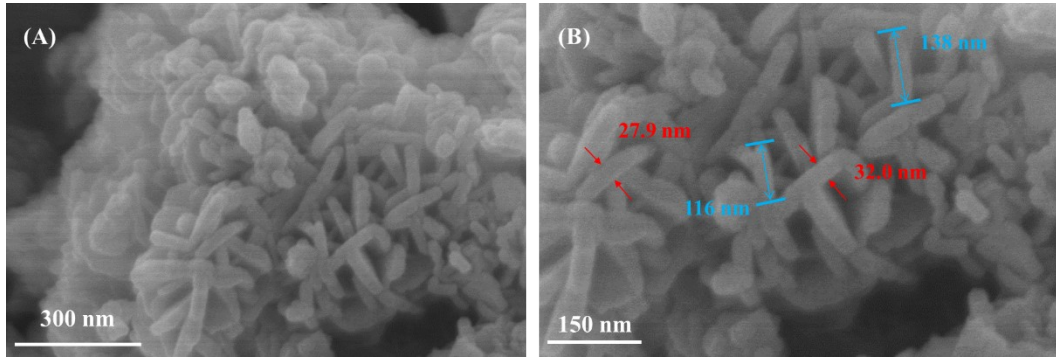

**Fig. S2.** SEM images of  $\text{Cu}_1\text{Mg}_3\text{Al}_2(\text{OH})_{12}\text{CO}_3$ .

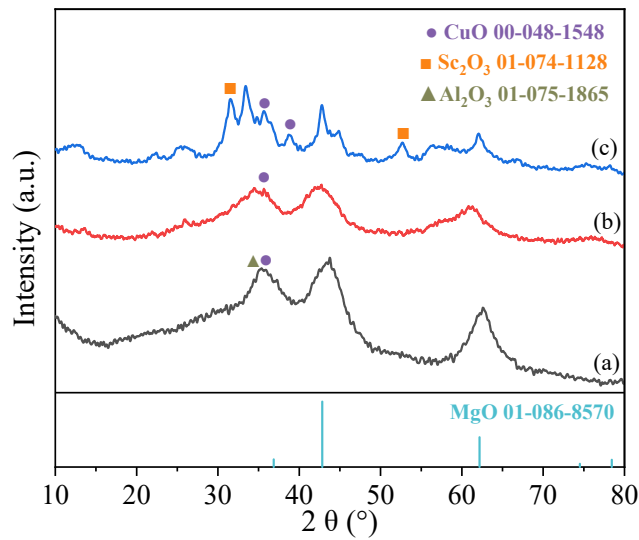

**Fig. S3.** XRD patterns of calcined samples.

(a)  $\text{Cu}_1\text{Mg}_3\text{Al}_2\text{O}_7$ ; (b)  $\text{Cu}_1\text{Mg}_3\text{Sc}_2\text{O}_7$ ; (c)  $\text{CuO}/\text{Mg}_3\text{Sc}_2\text{O}_7\text{-IM}$ .

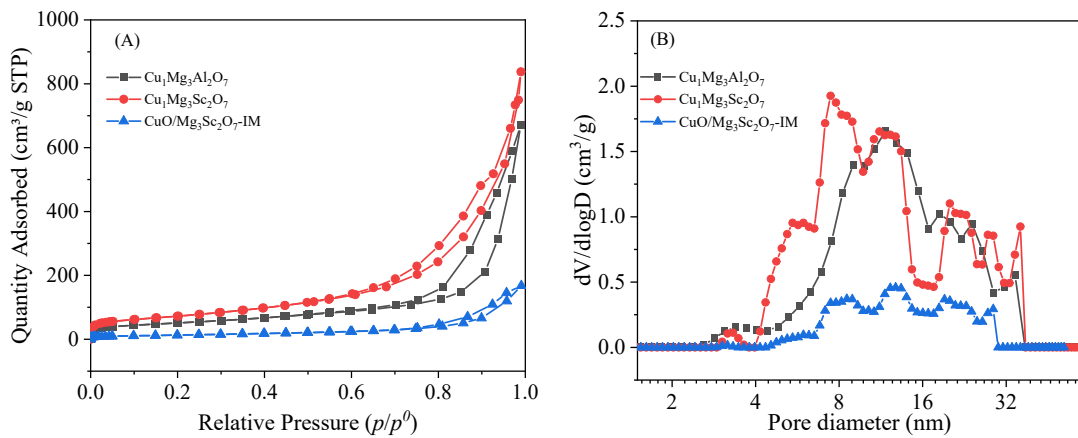

**Fig. S4.**  $\text{N}_2$  adsorption-desorption isotherms (A) and pore size distribution patterns (B) of calcined samples.

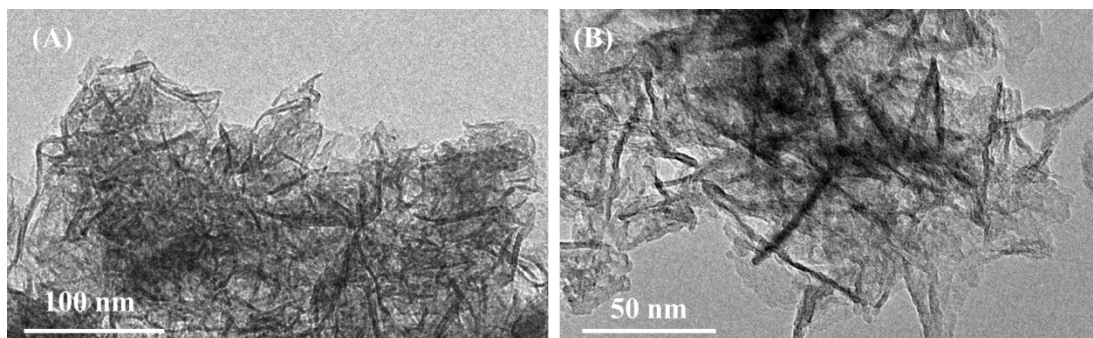

**Fig. S5.** HRTEM images of  $\text{Cu}_1\text{Mg}_3\text{Sc}_2\text{O}_7$ .

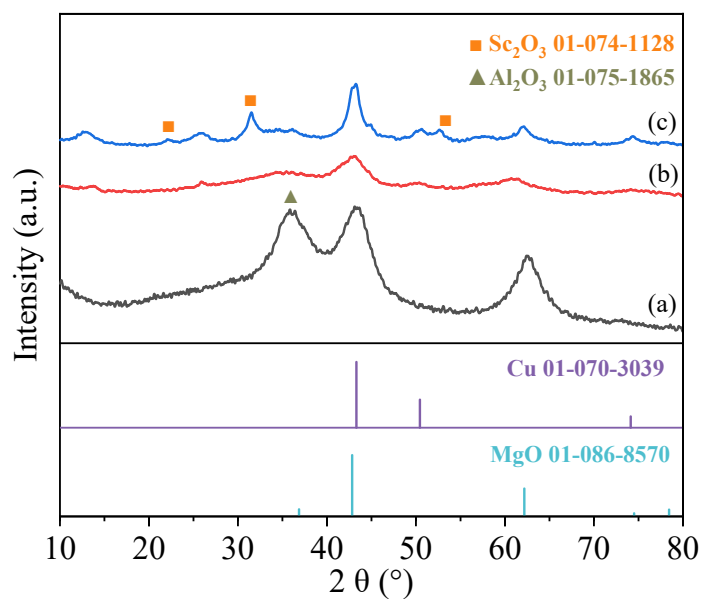

**Fig. S6.** XRD patterns of various catalysts.

(a)  $\text{Cu}_1/\text{Mg}_3\text{Al}_2\text{O}_6$ ; (b)  $\text{Cu}_1/\text{Mg}_3\text{Sc}_2\text{O}_6$ ; (c)  $\text{Cu}_1/\text{Mg}_3\text{Sc}_2\text{O}_6\text{-IM}$ .

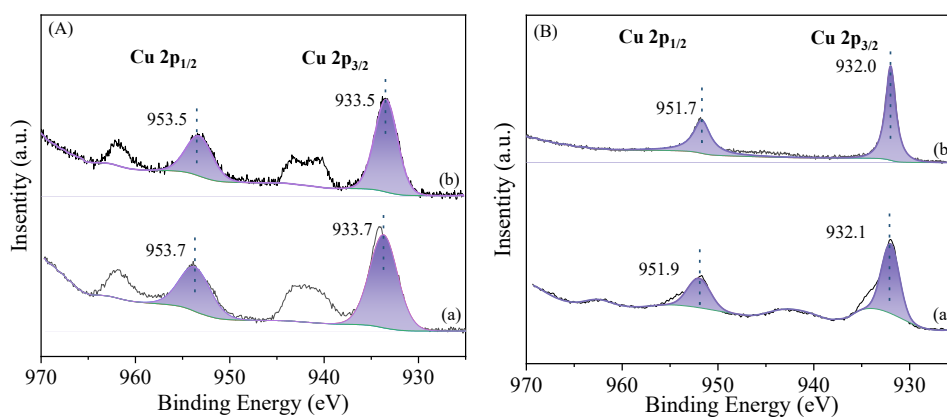

**Fig. S7.** XPS spectra of calcined samples (A) and reduced samples (B). (a)

$\text{Cu}_1/\text{Mg}_3\text{Al}_2\text{O}_6$ ; (b)  $\text{Cu}_1/\text{Mg}_3\text{Sc}_2\text{O}_6$ .

**Table S2**

Comparison of various catalysts for the hydrogenation of DMCD

| Number | Catalyst                                                        | Temp.<br>(°C) | P <sub>H<sub>2</sub></sub><br>(MPa) | H <sub>2</sub> /DMCD<br>(mol/mol) | WHSV <sub>DMCD</sub><br>(g·g <sub>cat</sub> <sup>-1</sup> ·h <sup>-1</sup> ) | Con. <sub>DMCD</sub><br>(%) | Sel. <sub>CHDM</sub><br>(%) | STY <sub>CHDM</sub><br>(g·g <sub>cat</sub> <sup>-1</sup> ·h <sup>-1</sup> ) | Reference |
|--------|-----------------------------------------------------------------|---------------|-------------------------------------|-----------------------------------|------------------------------------------------------------------------------|-----------------------------|-----------------------------|-----------------------------------------------------------------------------|-----------|
| 1      | Cu <sub>1</sub> /Mg <sub>3</sub> Sc <sub>2</sub> O <sub>6</sub> | 250           | 2.0                                 | 120                               | 0.49                                                                         | 99.3                        | 97.0                        | 0.34                                                                        | This work |
| 2      | Cu-ZZ-35                                                        | 220           | 8.0                                 | -                                 | 0.44                                                                         | 99.4                        | 97.4                        | 0.31                                                                        | [1]       |
| 3      | Cu-3                                                            | 220           | 6.0                                 | 203                               | 0.09                                                                         | 100                         | 99.8                        | 0.06                                                                        | [2]       |
| 4      | R-CAZ-10                                                        | 220           | 8.0                                 | -                                 | -                                                                            | 98.8                        | 95.8                        | -                                                                           | [3]       |
| 5      | Cu-600                                                          | 220           | 8.0                                 | 406                               | 0.44                                                                         | 99.8                        | 95.8                        | 0.30                                                                        | [4]       |
| 6      | Cu-55                                                           | 220           | 6.0                                 | 220                               | 3.3                                                                          | 97.3                        | 96.1                        | 2.2                                                                         | [5]       |
| 7      | CSNTs-623                                                       | 220           | 5.0                                 | 260                               | 0.08                                                                         | 100                         | 96.3                        | 0.05                                                                        | [6]       |
| 8      | Re <sub>5</sub> /AC                                             | 220           | 10.0                                | -                                 | -                                                                            | 99                          | 67                          | -                                                                           | [7]       |

**Table S3**

Hydrogenation activity of DMCD reaction solution with various concentration.

| DMCD<br>concentrations (wt%) | Con.<br>(%) | Selectivity (%)    |                   |                   |                    | C.B.<br>(%) <sup>e</sup> |
|------------------------------|-------------|--------------------|-------------------|-------------------|--------------------|--------------------------|
|                              |             | MHMCC <sup>a</sup> | CHDM <sup>b</sup> | MCHM <sup>c</sup> | MOMCM <sup>d</sup> |                          |
| 13                           | 99.3        | 1.0                | 97.0              | 1.4               | 0.3                | 99.7                     |
| 20                           | 99.4        | 4.6                | 94.1              | 0.9               | 0.2                | 99.8                     |
| 30                           | 99.5        | 6.3                | 92.0              | 1.0               | 0.4                | 99.7                     |
| 40                           | 99.1        | 7.6                | 90.7              | 0.8               | 0.5                | 99.6                     |

Reaction conditions: 1.0 g catalyst, 2.0 MPa, 250 °C, WHSV<sub>DMCD</sub>=0.49 h<sup>-1</sup>, H<sub>2</sub>/DMCD=120 (mol/mol).<sup>a</sup> MHMCC, methyl 4-hydroxymethyl-cyclohexane carboxylate.<sup>b</sup> CHDM, 1, 4-cyclohexane dimethanol.<sup>c</sup> MCHM, 4-methyl-cyclohexane methanol.<sup>d</sup> MOMCM, 4-((Methoxymethyl)cyclohexyl) methanol.<sup>e</sup> Carbon balance, defined as (All carbon atoms detected in liquid products) / (All carbon atoms in feed) × 100%

Table S3 indicated that the conversion of DMCD was higher than 99% even with a 40wt% concentration of DMCD in feed. But the selectivity of CHDM decreased slightly from 97% to 90.7%, as the selectivity of intermediate (MHMCC) increased.

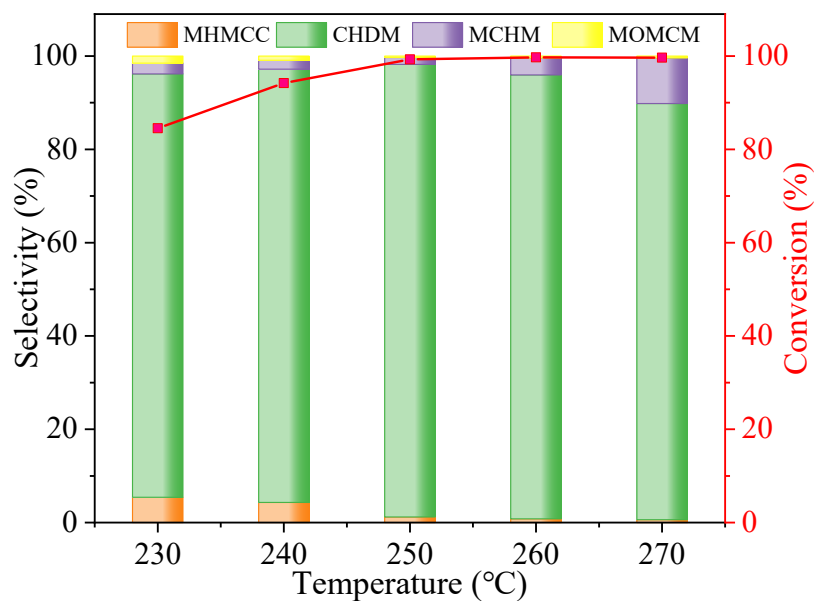

**Fig. S8.** Performance of  $\text{Cu}_1/\text{Mg}_3\text{Sc}_2\text{O}_6$  under varied reaction temperature.

Reaction conditions: 1.0 g catalyst, 2.0 MPa,  $\text{WHSV}_{\text{DMCD}}=0.49 \text{ h}^{-1}$ ,  
 $\text{H}_2/\text{DMCD}=120$  (mol/mol).

The performance of  $\text{Cu}_1/\text{Mg}_3\text{Sc}_2\text{O}_6$  catalyst under various reaction temperatures (Fig. S8) indicated that the conversion of DMCD increased quickly from 84.5% (230 °C) to above 99.3% (250 °C) and nearly fully conversion after that. While the selectivity of CHDM increased from 90.4% (230 °C) to 97% (250 °C), and then decreased slightly with the increasing temperature because the deep hydrogenation of CHDM to MCHM.

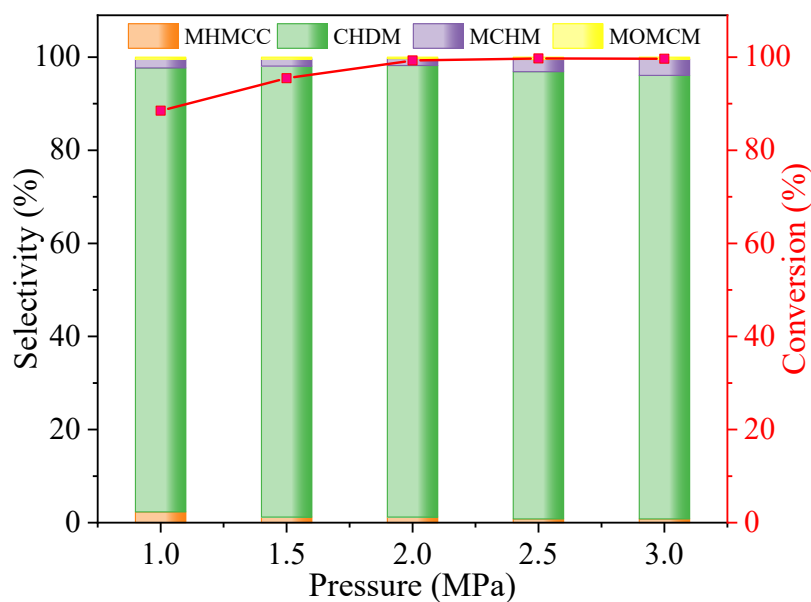

**Fig. S9.** Performance of  $\text{Cu}_1/\text{Mg}_3\text{Sc}_2\text{O}_6$  under varied  $\text{H}_2$  Pressure. Reaction conditions: 1.0 g catalyst, 250 °C,  $\text{WHSV}_{\text{DMCD}}=0.49 \text{ h}^{-1}$ ,  $\text{H}_2/\text{DMCD}=120$  (mol/mol).

The performance of  $\text{Cu}_1/\text{Mg}_3\text{Sc}_2\text{O}_6$  catalyst under various reaction pressure (Fig. S9) confirmed that it is active even at a very low  $\text{H}_2$  pressure (1.0 MPa) and the conversion of DMCD reached 88.5%. The conversion of DMCD increased continuously with the raising pressure, while the selectivity of CHDM changed slightly during the varied reaction pressure.



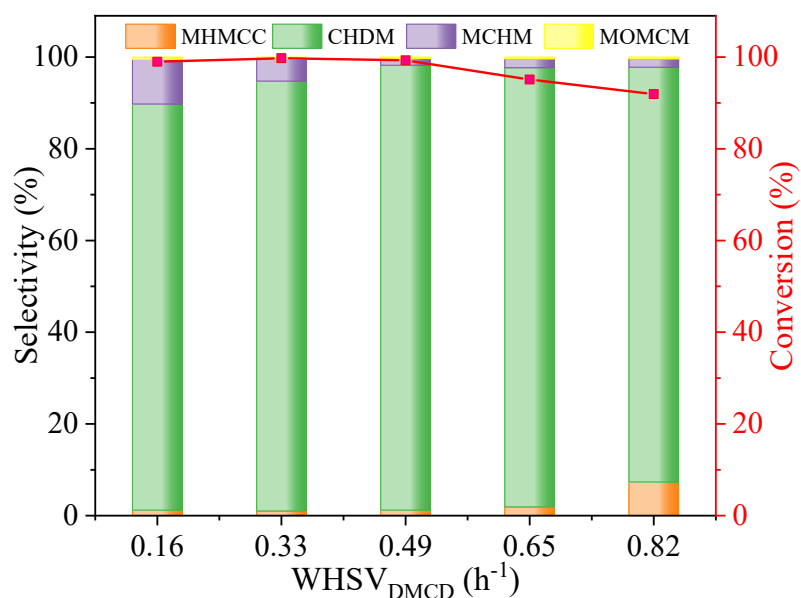

**Fig. S10.** The activity of  $\text{Cu}_1/\text{Mg}_3\text{Sc}_2\text{O}_6$  under different  $\text{WHSV}_{\text{DMCD}}$ .  
 Reaction conditions: 1.0 g catalyst, 250 °C, 2.0 MPa,  $\text{H}_2/\text{DMCD}=120$  (mol/mol).

Fig. S10 exhibited the performance of  $\text{Cu}_1/\text{Mg}_3\text{Sc}_2\text{O}_6$  catalyst for the hydrogenation of DMCD at various  $\text{WHSV}_{\text{DMCD}}$  at (250 °C, 2 MPa). It was found that DMCD has been converted completely when  $\text{WHSV}_{\text{DMCD}}$  was less than  $0.49 \text{ h}^{-1}$ , but the selectivity of over-hydrogenation product (MCHM) was higher at 0.16 and  $0.33 \text{ h}^{-1}$ , which depressed the selectivity of CHDM. On the other hand, the conversion of DMCD decreased with the increasing WHSV to  $0.82 \text{ h}^{-1}$ , and the selectivity of intermediate (MHMCC) increased.

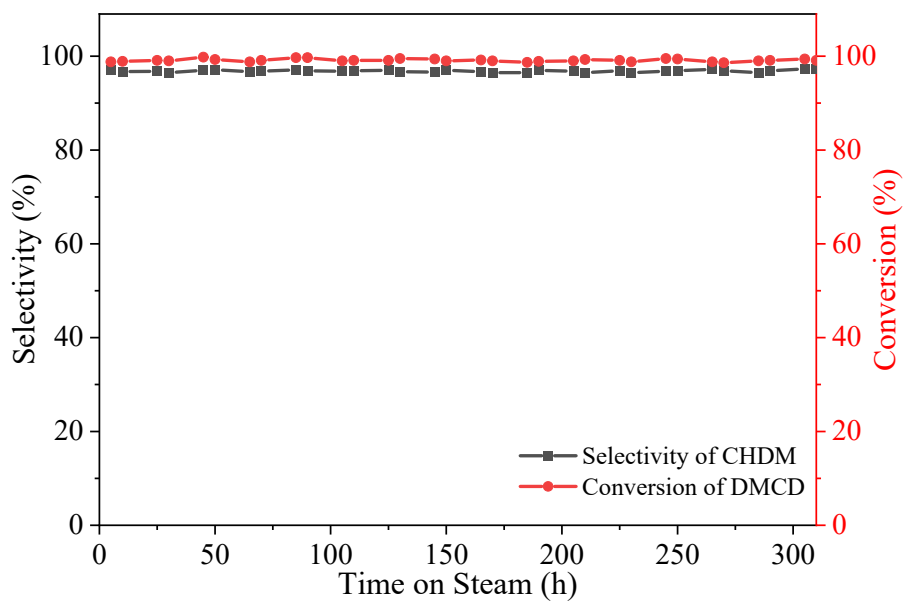

**Fig. S11.** Stability of  $\text{Cu}_1/\text{Mg}_3\text{Sc}_2\text{O}_6$  for the hydrogenation of DMCD.

Reaction conditions: 1.0 g catalyst, 250 °C, 2.0 MPa,  $\text{WHSV}_{\text{DMCD}}=0.49 \text{ h}^{-1}$ ,  $\text{H}_2/\text{DMCD}=120$  (mol/mol).

Fig. S11 exhibited the stability of  $\text{Cu}_1/\text{Mg}_3\text{Sc}_2\text{O}_6$  for hydrogenation of DMCD under optimized reaction conditions (2.0 MPa, 250 °C,  $\text{WHSV}_{\text{DMCD}}=0.49 \text{ h}^{-1}$ ,  $\text{H}_2/\text{DMCD}=120$  (mol/mol)), it was confirmed that  $\text{Cu}_1/\text{Mg}_3\text{Sc}_2\text{O}_6$  can remain its performance for more than 300 h on stream.

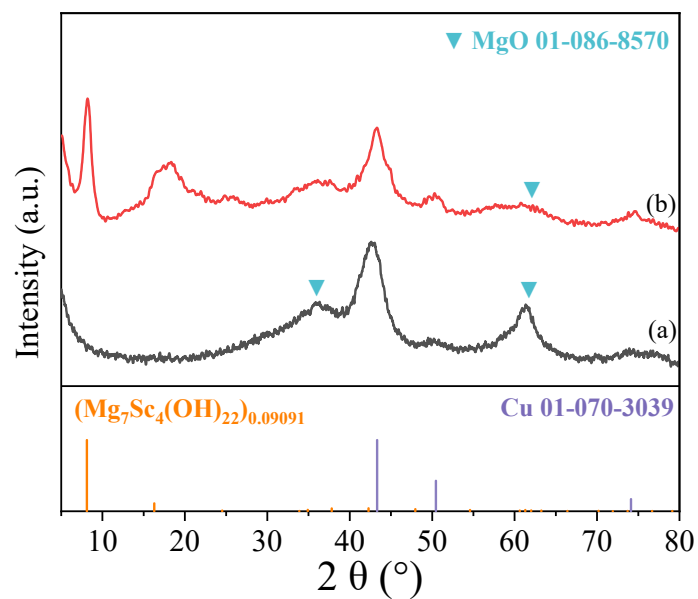

**Fig. S12.** XRD patterns of (a) fresh  $\text{Cu}_1/\text{Mg}_3\text{Sc}_2\text{O}_6$ ; (b) spent  $\text{Cu}_1/\text{Mg}_3\text{Sc}_2\text{O}_6$ .

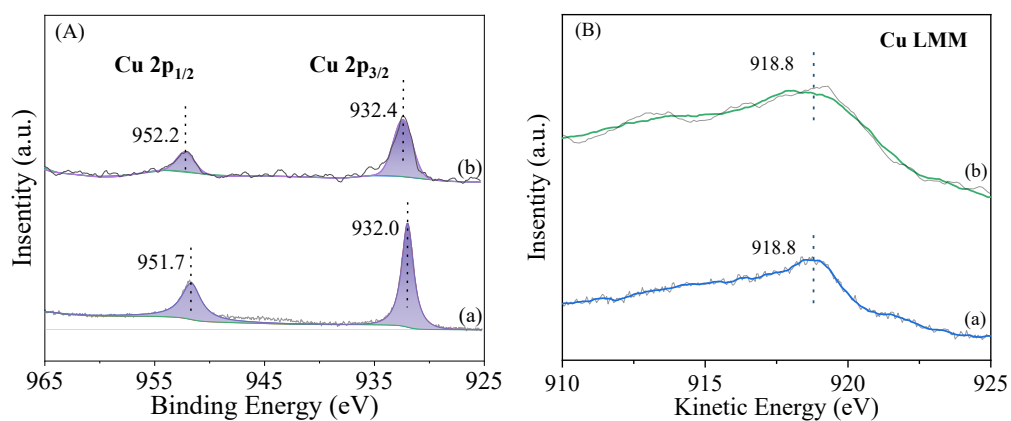

**Fig. S13.** XPS spectra (A) and corresponding AES spectra (B).

(a) fresh  $\text{Cu}_1/\text{Mg}_3\text{Sc}_2\text{O}_6$ ; (b) spent  $\text{Cu}_1/\text{Mg}_3\text{Sc}_2\text{O}_6$ .

## References

- 1 S. Zhang, Q. Hu, G. Fan and F. Li, *Catal. Commun.*, 2013, **39**, 96-101.
- 2 S. Zhang, G. Fan and F. Li, *Green Chem.*, 2013, **15**, 2389-2393.
- 3 Q. Hu, G. Fan, L. Yang and F. Li, *ChemCatChem*, 2014, **6**, 3501-3510.
- 4 Q. Hu, G. Fan, S. Zhang, L. Yang and F. Li, *J. Mol. Catal. A: Chem.*, 2015, **397**, 134-141.
- 5 H. Liu, Q. Hu, G. Fan, L. Yang and F. Li, *Catal. Sci. Technol.*, 2015, **5**, 3960-3969.
- 6 X. Gong, M. Wang, H. Fang, X. Qian, L. Ye, X. Duan and Y. Yuan, *Chem. Commun.*, 2017, **53**, 6933-6936.
- 7 J. Luo, E. Qu, Y. Zhou, Y. Dong and C. Liang, *Appl. Catal., A*, 2020, **602**, 117669.
